# Supplementary material for: In situ electrosynthesis of hydrogen peroxide with an improved gas diffusion cathode by rolling carbon black and PTFE
Source: Royal Society of Chemistry journal article supplement (doi:10.1039/c5ra09636g), 2015-01-01
Supplement: c5ra09636g1.pdf [file c5ra09636g1.pdf]

## Supplementary materials

Fig. S1 Carbon black characteristics of (a) partical size and (b) N<sub>2</sub> adsorption/desorption isotherms

Fig. S2 Variation of pH value as the function of electrolytic time.

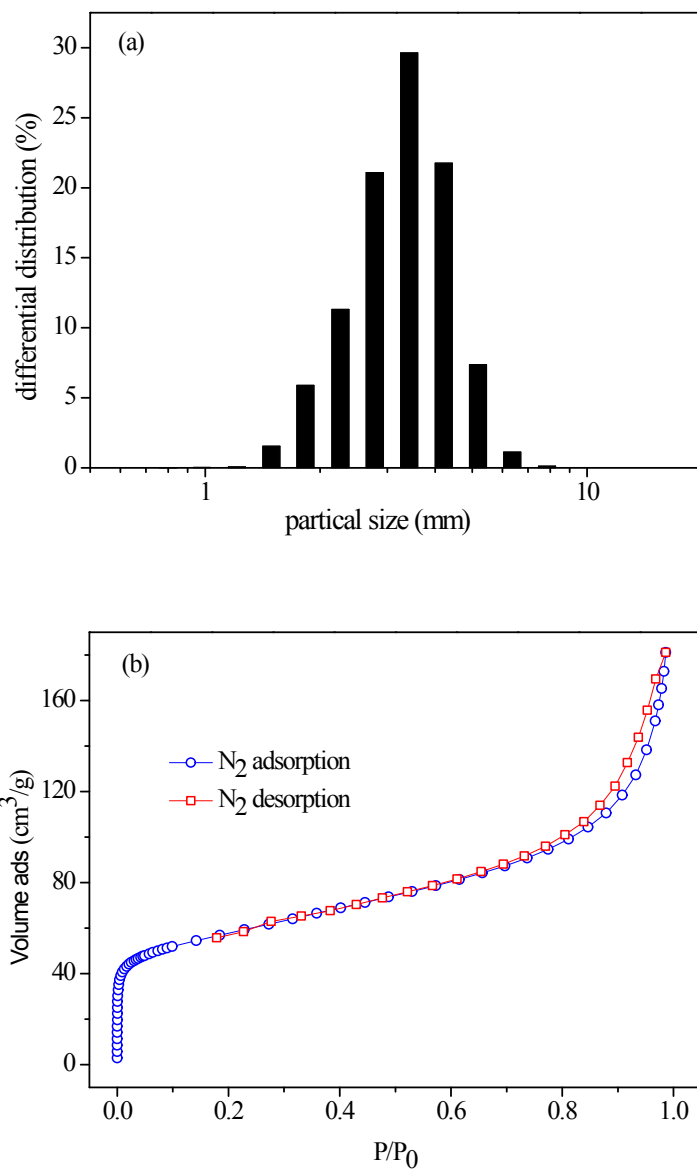

Fig. S1 Carbon black characteristics of (a) particle size and (b) N<sub>2</sub> adsorption/desorption isotherms

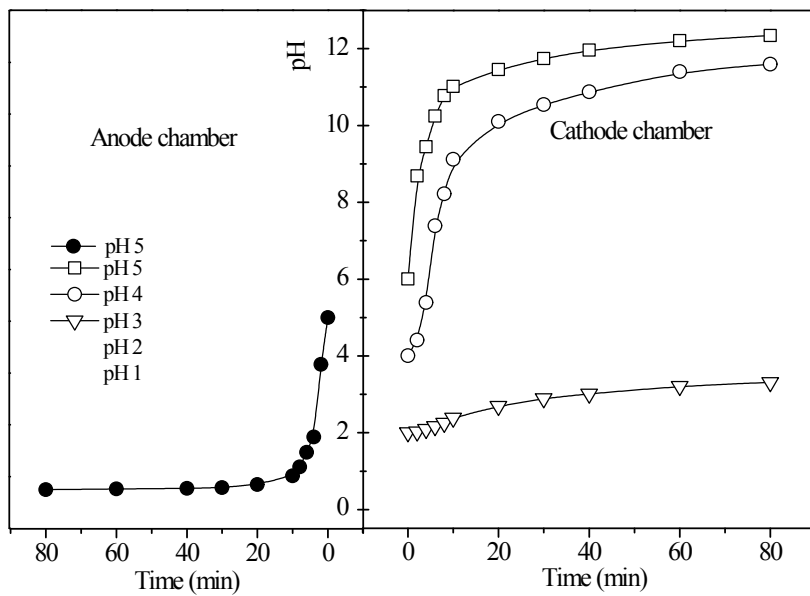

Fig. S2 Variation of pH value as the function of electrolytic time.
